# Supplementary material for: Tumour-selective activity of RAS-GTP inhibition in pancreatic cancer
Source: PubMed Central journal article supplement (PMC11111406; doi:10.1038/s41586-024-07379-z), 2024-04-08

**Supplementary information**

---

**Tumour-selective activity of RAS-GTP inhibition in pancreatic cancer**

---

In the format provided by the authors and unedited

Figure 1e - HPAC

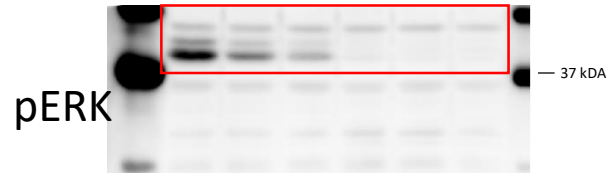

Total ERK

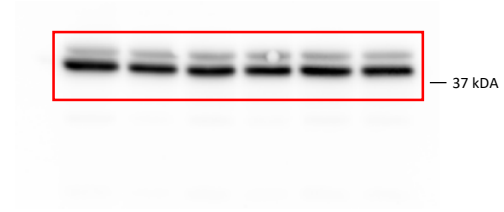

pAkt

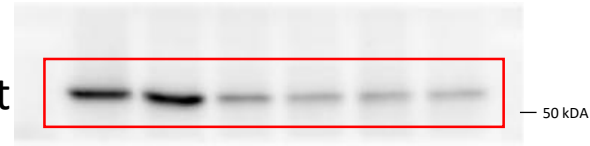

Total Akt

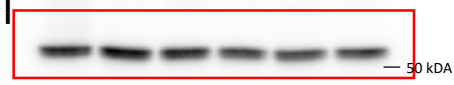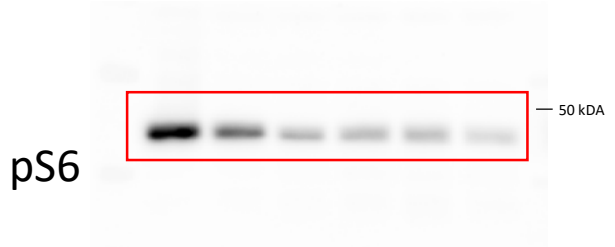

Total S6

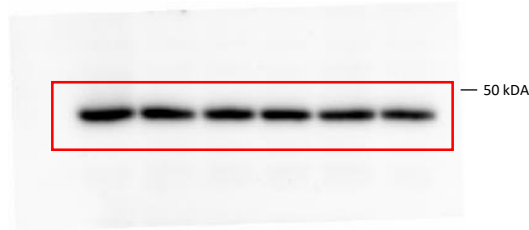

Vinculin

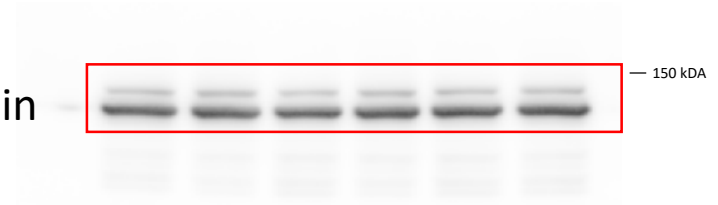

# Extended Data Figure 1d – Pa14C

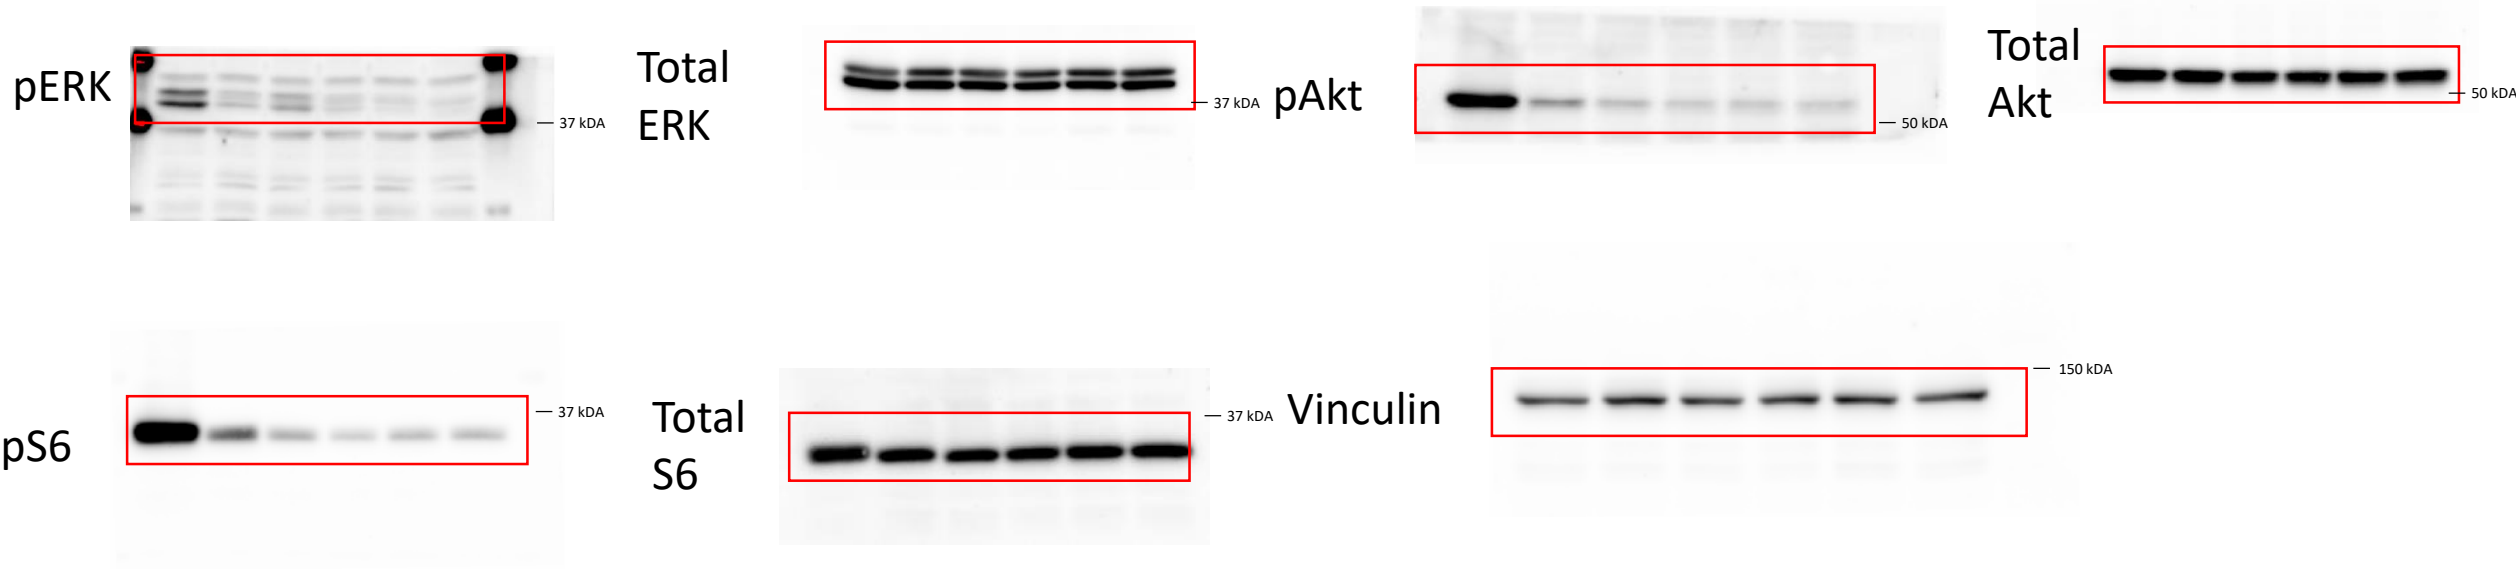

# Extended Data Figure 1d – Panc1

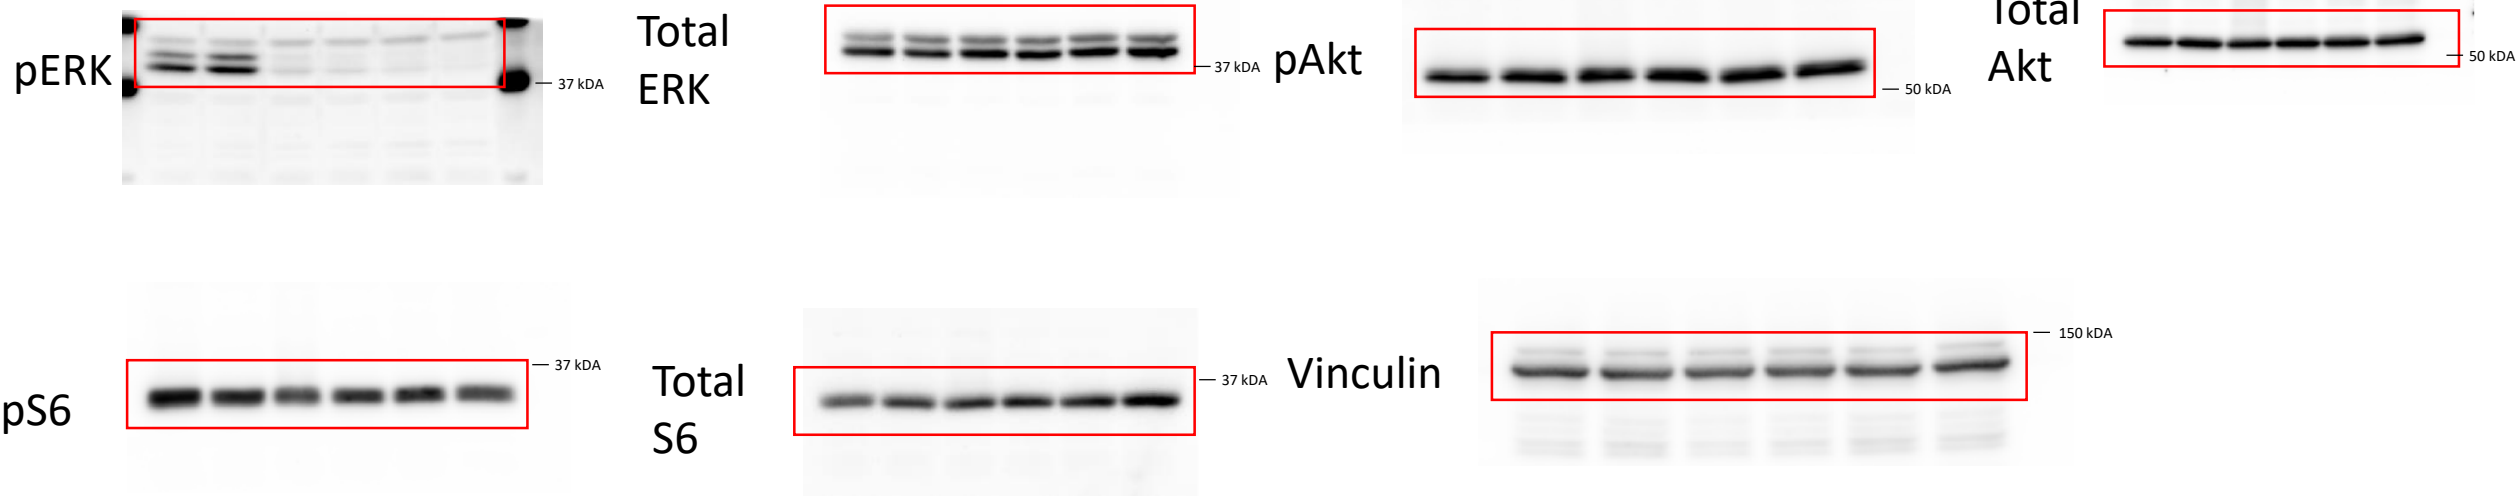

# Extended Data Figure 1d – Pa16C

pERK

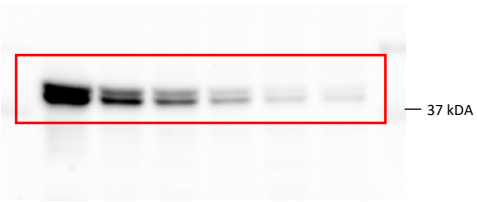

Total ERK

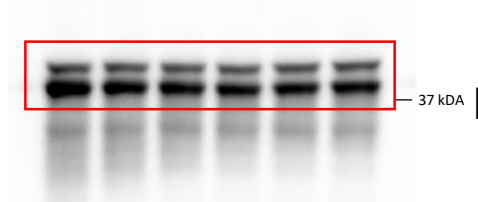

pAkt

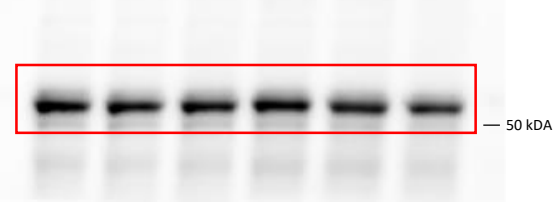

Total Akt

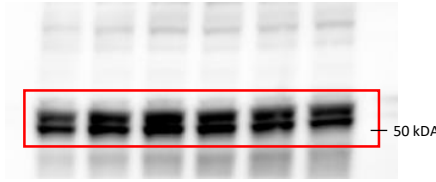

pS6

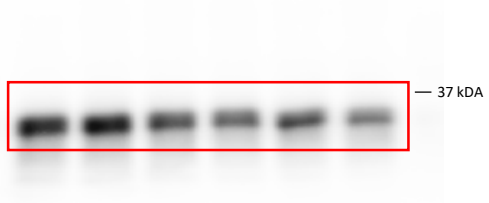

Total S6

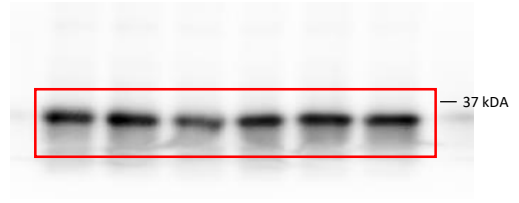

Vinculin

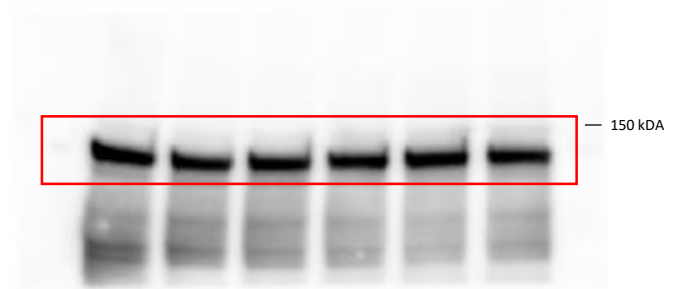

# Extended Data Figure 1d – Pa01C

pERK

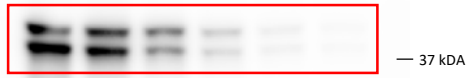

Total ERK

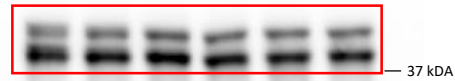

pAkt

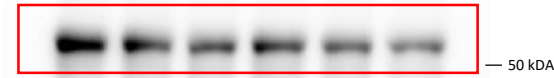

Total Akt

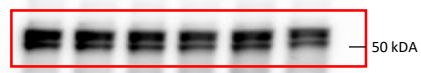

pS6

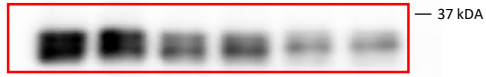

Total S6

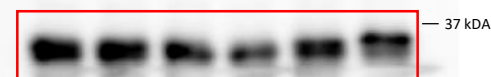

Vinculin

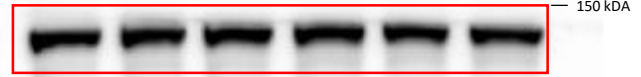

Figure 1f

Extended Data Figure 1e

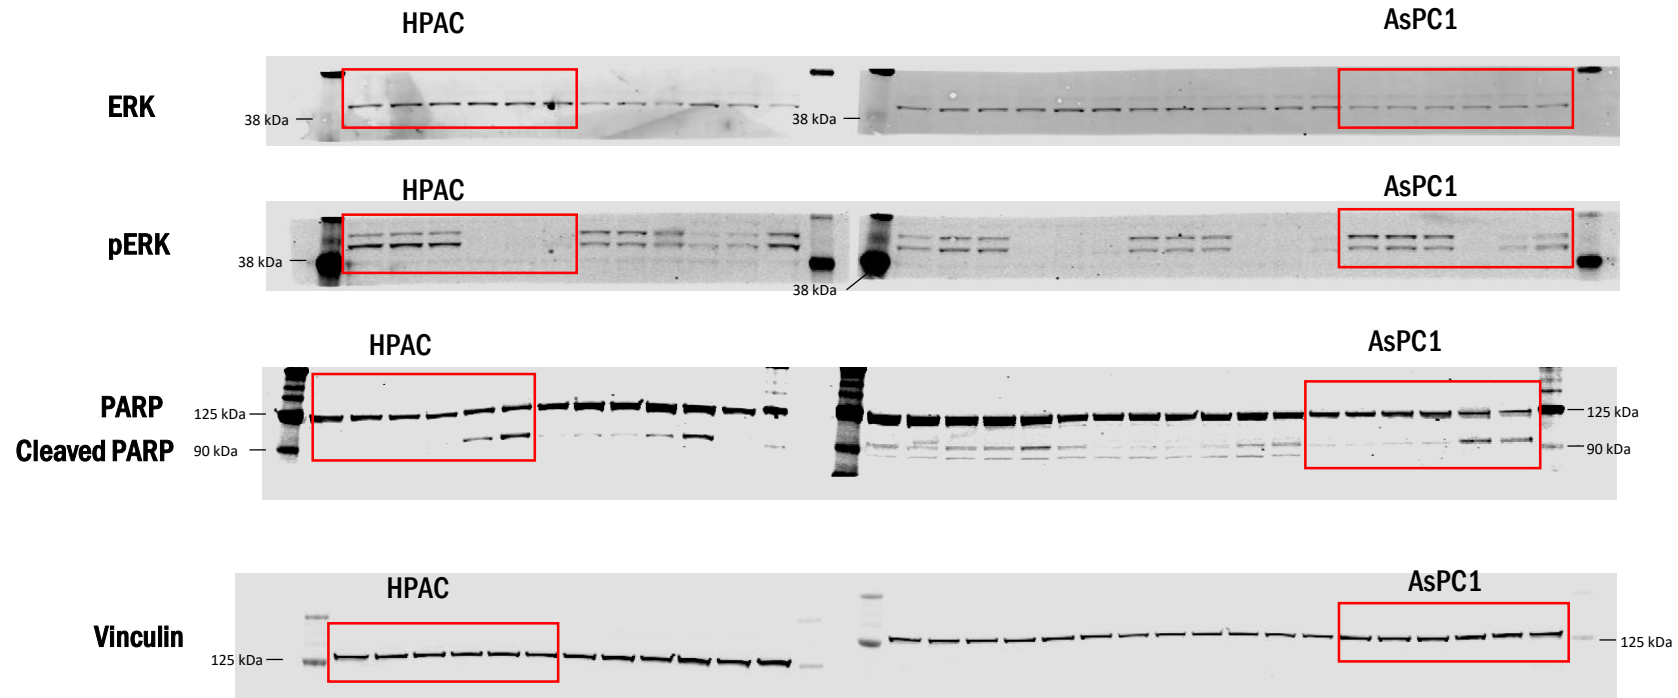

Extended Data Fig 1c

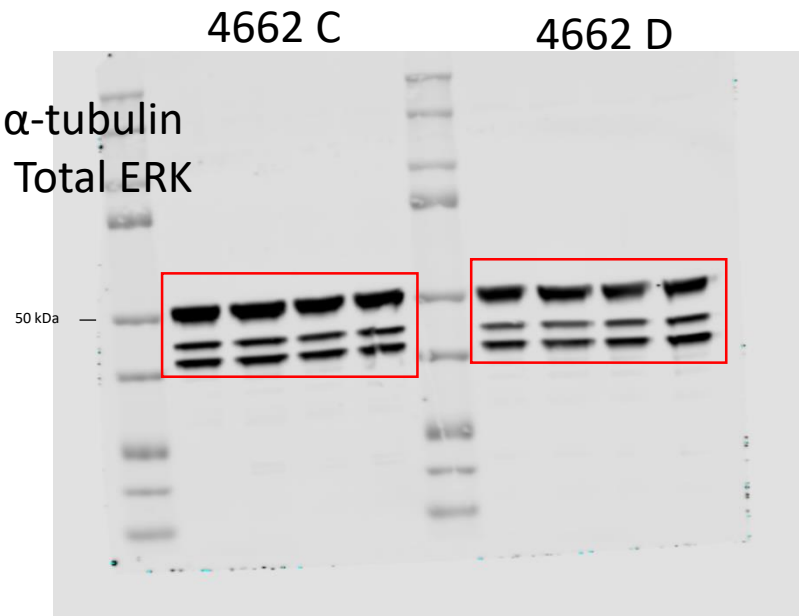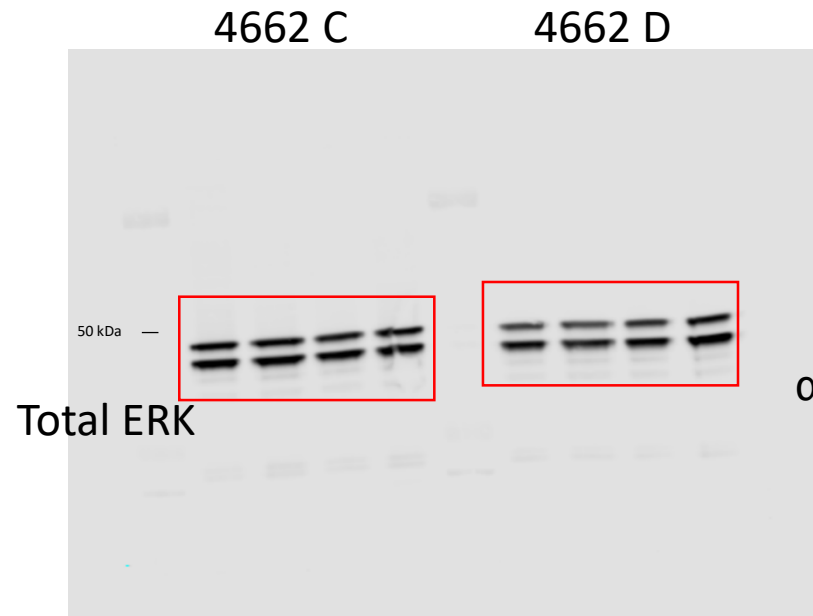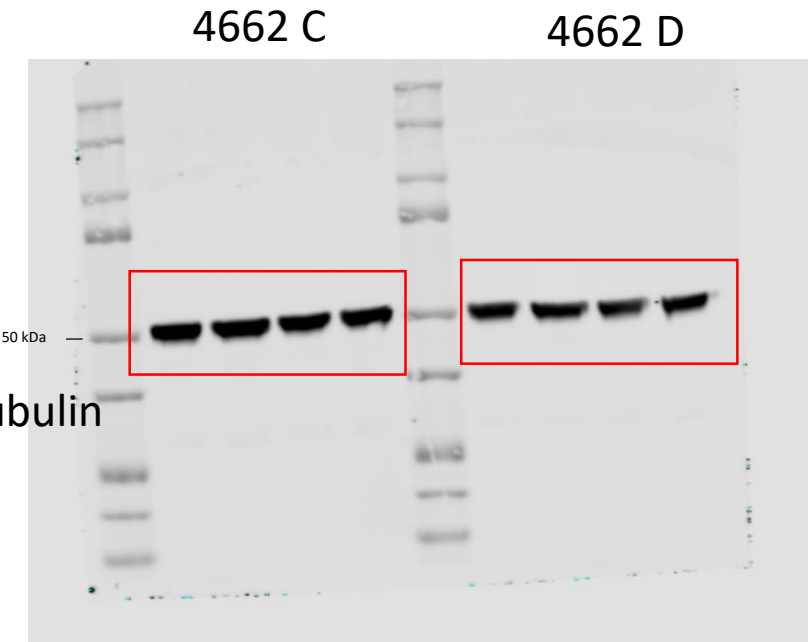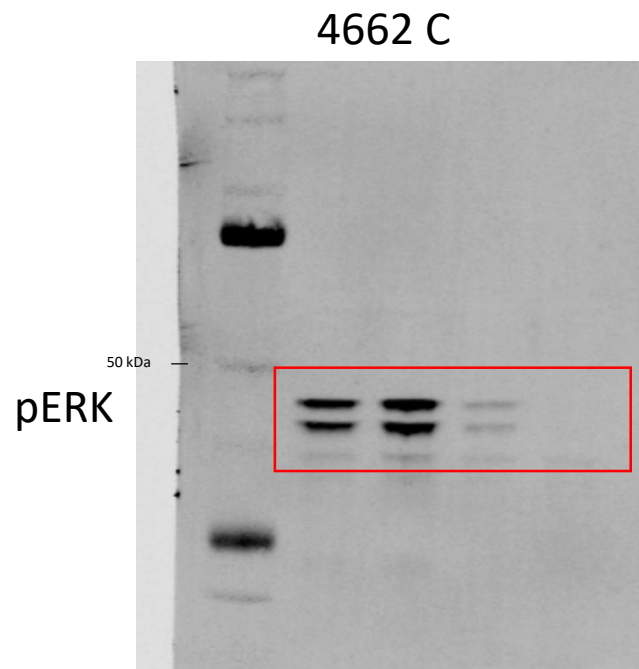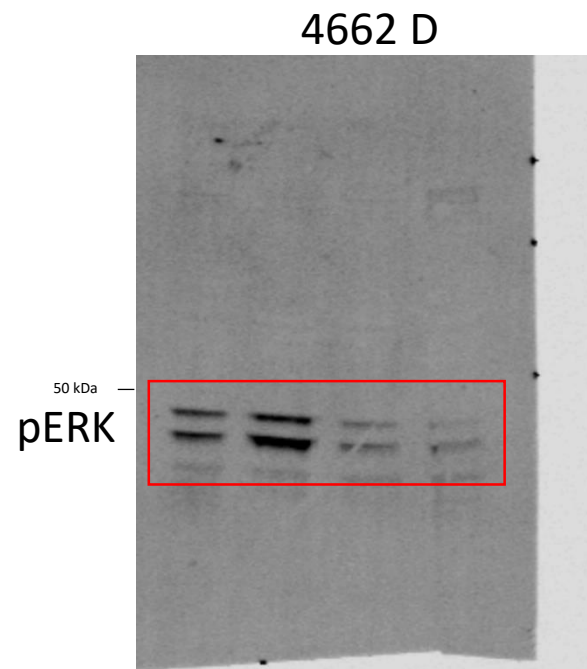



Extended Data Fig 1c

6419c5

Total  
ERK

50 kDa

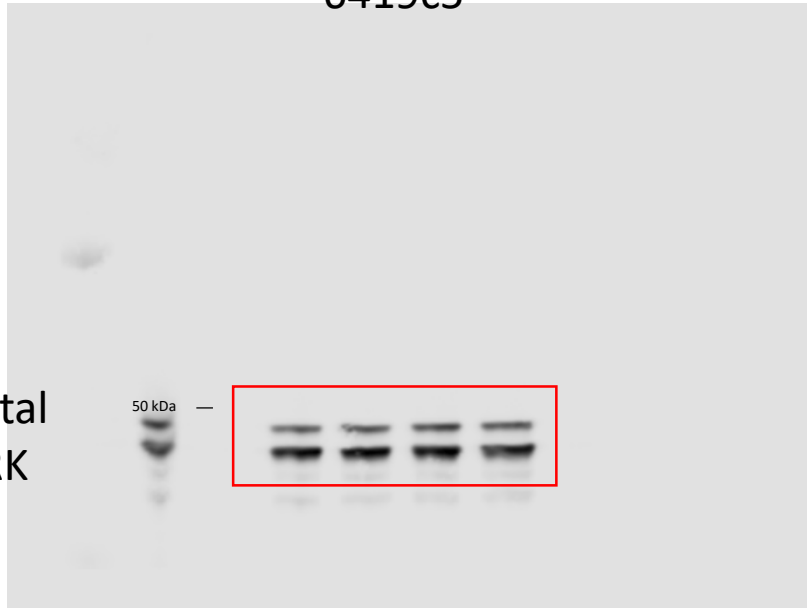

6419c5

$\alpha$ -Tubulin

50 kDa

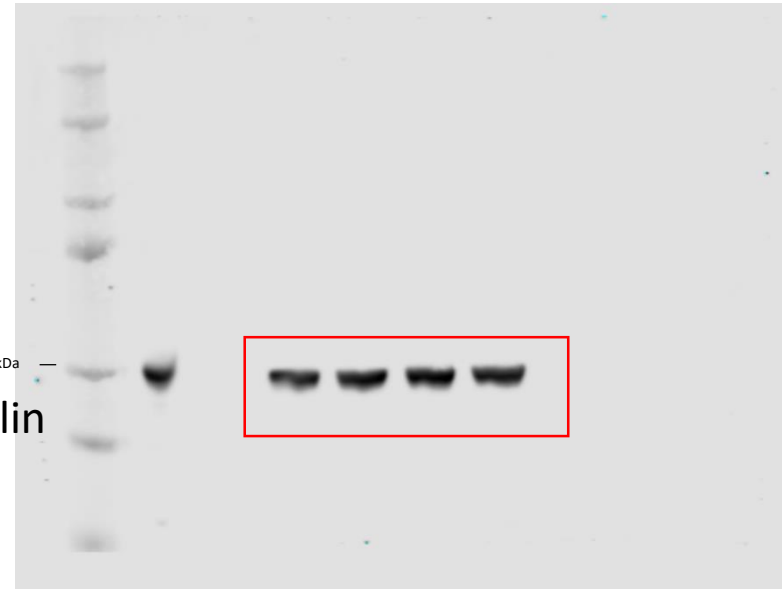

6419c5

pERK

50 kDa

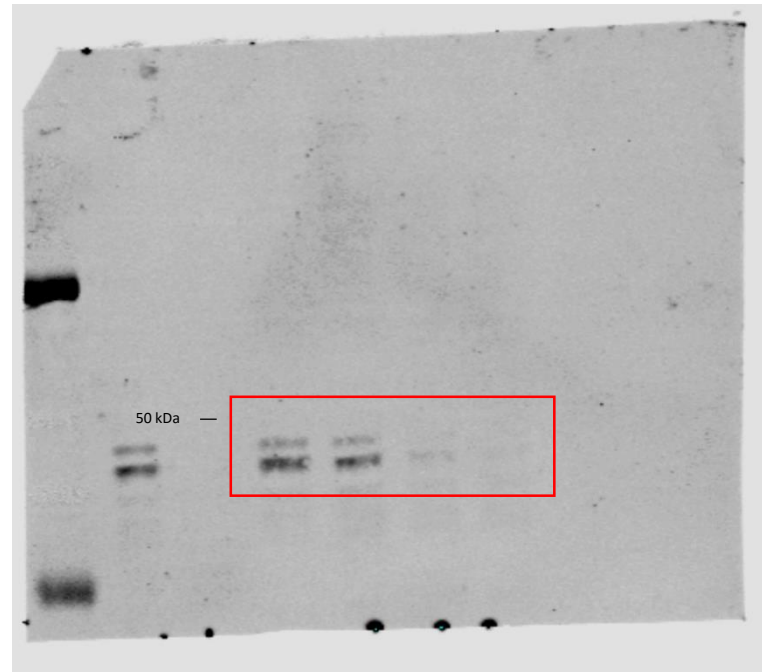

pERK<sup>T202/Y204</sup>

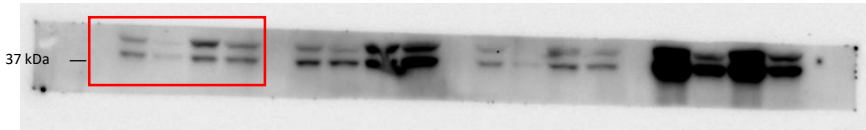

Total ERK

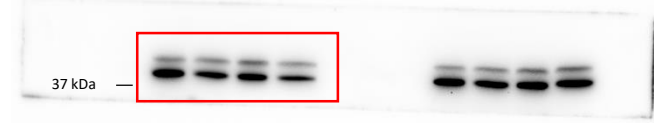

MYC

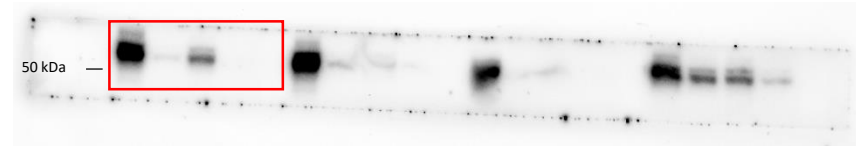

CYR61

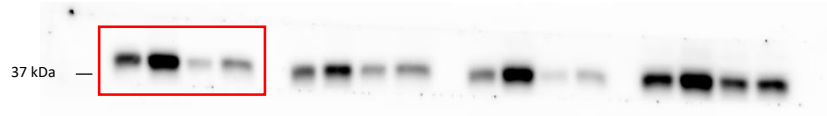

cPARP

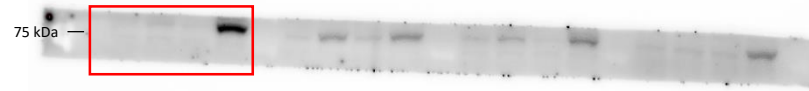

Survivin

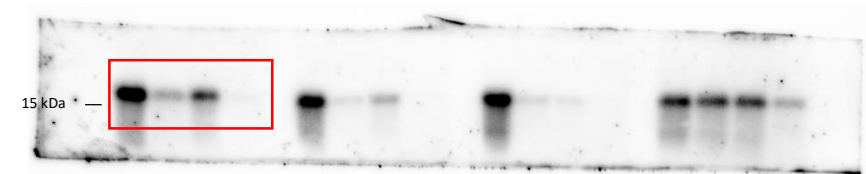

CDC20

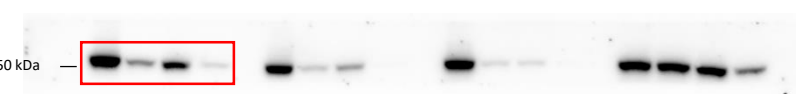

ECT2

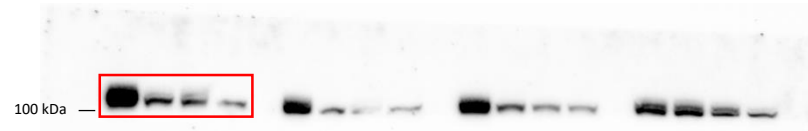

Vinculin

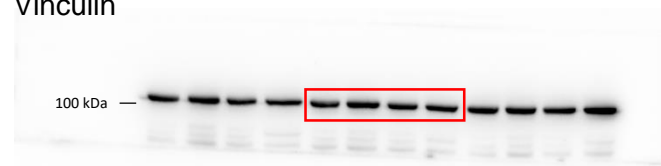

β-tubulin

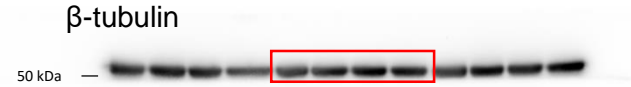

pERK<sup>T202/Y204</sup>

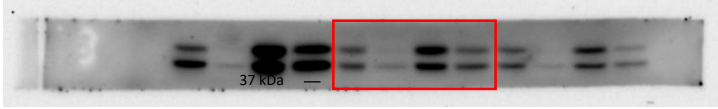

Total ERK

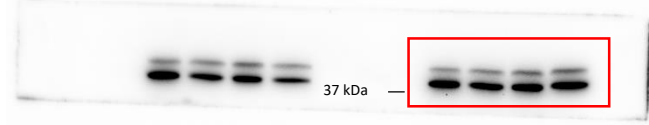

MYC

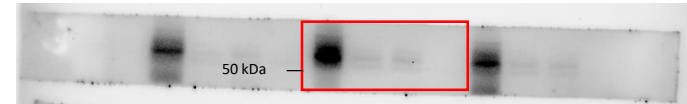

CYR61

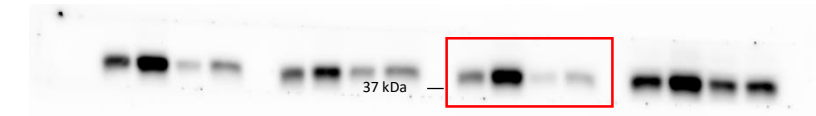

cPARP

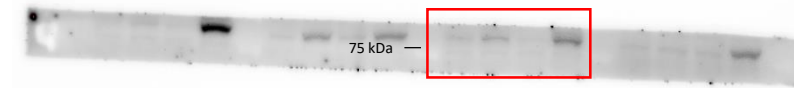

Survivin

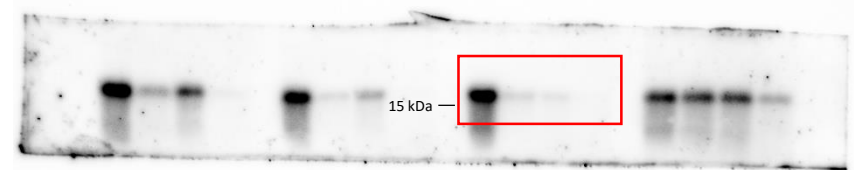

CDC20

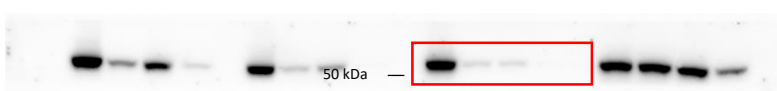

ECT2

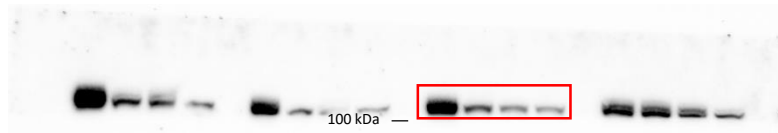

Vinculin

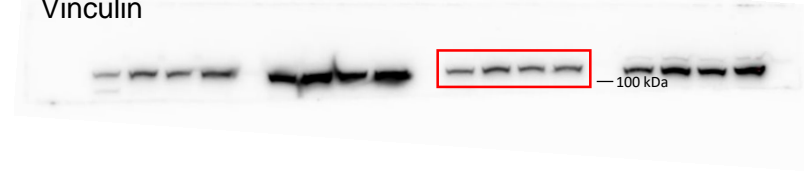

$\beta$ -tubulin

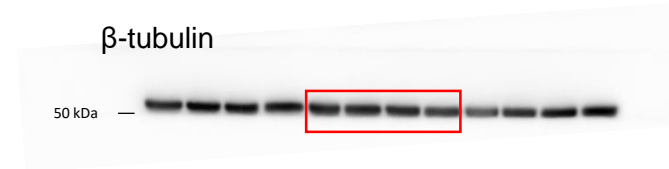

Figure 6f – K18745R

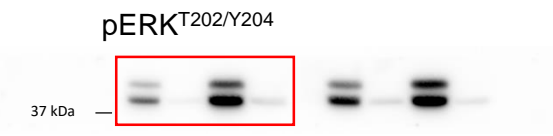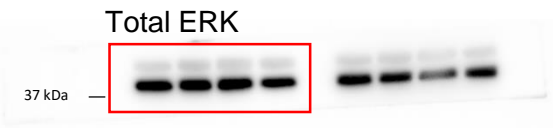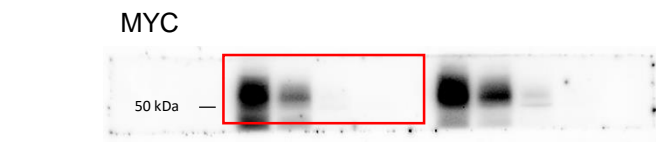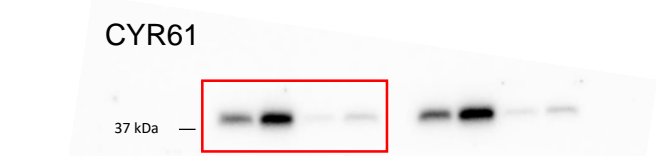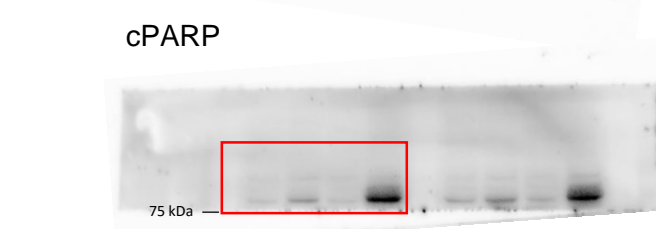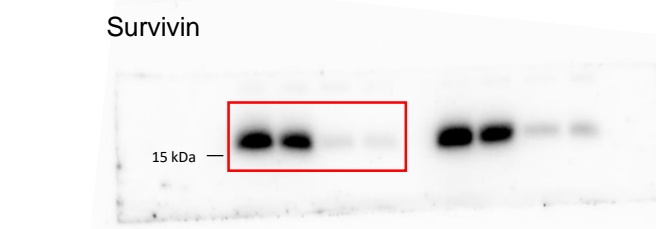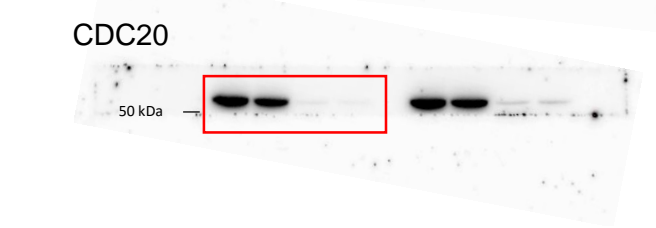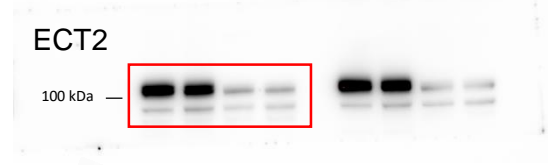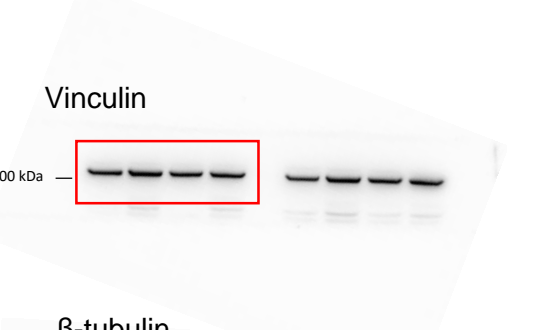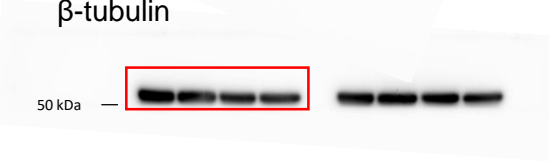

pERK<sup>T202/Y204</sup>

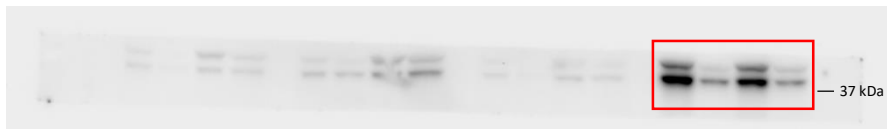

Total ERK

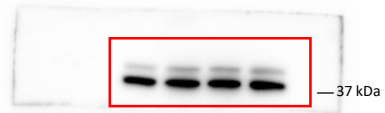

MYC

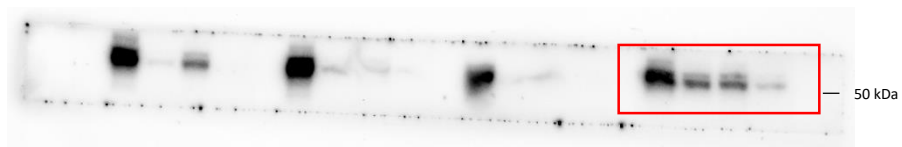

CYR61

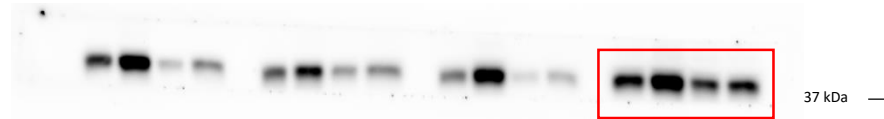

cPARP

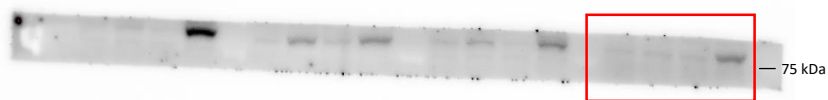

Survivin

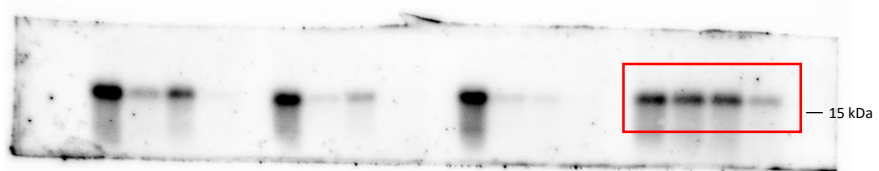

CDC20

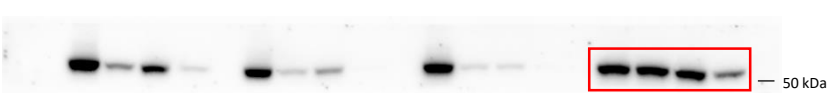

ECT2

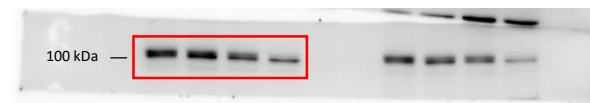

Vinculin

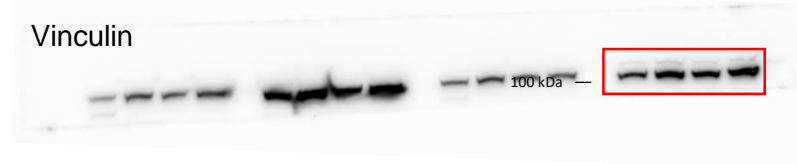

$\beta$ -tubulin

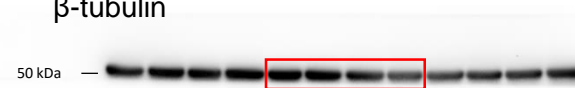

Supplement: 41586_2024_7379_MOESM1_ESM.pdf [file 41586_2024_7379_MOESM1_ESM.pdf]
